# Supplementary material
Source: PubMed Central journal article supplement (PMC3663893)
Supplement: NIHMS439524-supplement-Supp_Table_S3.pdf [file NIHMS439524-supplement-Supp_Table_S3.pdf]

**Table S3. Arrays analysis of miRNAs up- or down-regulated in HOB cells following treatment with 1,25D (n=3 separate culture preparations)**

| miRNA             | P value (group) | P value (treated vs vehicle) | Ratio (treated vs vehicle) | Fold-change (treated vs vehicle) | Direction of fold-change (treated vs vehicle) | F (group) | SS (group) | SS (error) |
|-------------------|-----------------|------------------------------|----------------------------|----------------------------------|-----------------------------------------------|-----------|------------|------------|
| hsa-miRPlus-E1148 | 0.00203882      | 0.00203882                   | 0.580467                   | -1.72275                         | down                                          | 50.9307   | 0.923667   | 0.072543   |
| mmu-miR-450b-5p   | 0.0185626       | 0.0185626                    | 0.656984                   | -1.52211                         | down                                          | 14.6956   | 0.550982   | 0.149972   |
| ebv-miR-BART4     | 0.0260463       | 0.0260463                    | 0.654783                   | -1.52722                         | down                                          | 11.9049   | 0.559818   | 0.188097   |
| hsv1-miR-H2*      | 0.0517376       | 0.0517376                    | 1.58618                    | 1.58618                          | up                                            | 7.52487   | 0.664453   | 0.353204   |
| hsa-miR-637       | 0.0590673       | 0.0590673                    | 2.47297                    | 2.47297                          | up                                            | 6.84172   | 2.55942    | 1.49636    |
| hsa-miRPlus-E1186 | 0.0654071       | 0.0654071                    | 1.5718                     | 1.5718                           | up                                            | 6.34676   | 0.638482   | 0.402399   |
| mcmv-miR-m88-1*   | 0.072164        | 0.072164                     | 1.57476                    | 1.57476                          | up                                            | 5.89348   | 0.643801   | 0.436959   |
| kshv-miR-K12-9*   | 0.0722943       | 0.0722943                    | 1.65881                    | 1.65881                          | up                                            | 5.88538   | 0.799677   | 0.543501   |
| hsa-miRPlus-E1110 | 0.07985         | 0.07985                      | 1.50257                    | 1.50257                          | up                                            | 5.45029   | 0.517613   | 0.379879   |
| rno-miR-20b-5p    | 0.0868239       | 0.0868239                    | 0.599272                   | -1.66869                         | down                                          | 5.10085   | 0.818557   | 0.641899   |
| mmu-miR-466e-5p   | 0.0872131       | 0.0872131                    | 0.469537                   | -2.12976                         | down                                          | 5.08261   | 1.78441    | 1.40433    |
| mmu-miR-690       | 0.0960418       | 0.0960418                    | 1.66931                    | 1.66931                          | up                                            | 4.69954   | 0.819746   | 0.697725   |
| hsa-miR-1228      | 0.0988068       | 0.0988068                    | 1.95651                    | 1.95651                          | up                                            | 4.59043   | 1.40635    | 1.22546    |
